# Supplementary material for: Behavioral Disruptive Effects of Spathiphyllum Leaf Extract: Insights from Larval Assays in Drosophila melanogaster
Source: Research Square preprint supplement (doi:10.21203/rs.3.rs-6758746/v1), 2025-09-18
Supplement: Supplementary file 1 [file fb8afe47b52f8fc450d392ea.docx]

**Supplementary material**

| Phytochemical | Observation |
| --- | --- |
| Flavonoids | + |
| Alkaloids | + |
| Tannins | + |
| Phenol | + |
| Glycosides | - |
| Terpenoid/terpene | + |
| Saponins | - |
| Proteins | - |
| Carbohydrates | + |

**Supplementary Table-1: Phytochemical analysis of plant extract**


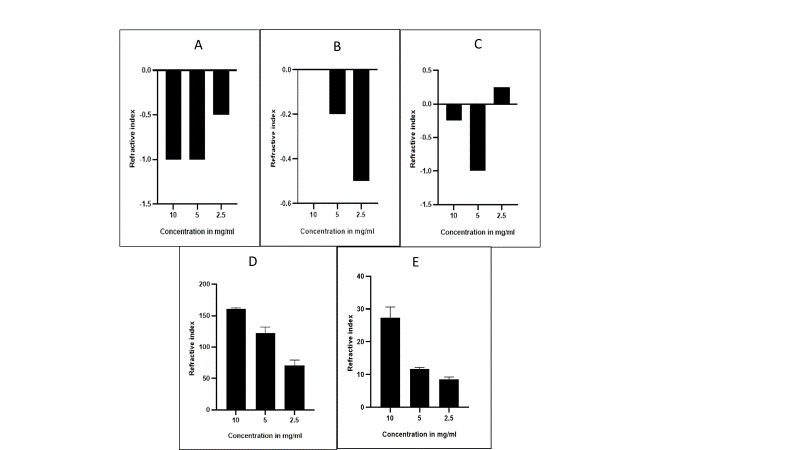


**Supplementary figure- 1: Treatment of SL extract on larvae in different concentration A) Olfactory assay B) Chemosensory assay C) Phototaxis assay D) Plasticity assay E) Motor function assay**
